- 1 Main manuscript contains the following:  
2 1. Main txt (abstract, introduction, results and discussion), Line 8 – Line 579;  
3 2. Online Methods, Line 588 - line 896;  
4 3. Figures and Tables, Line 924 – Line 1057;  
5 4. Supplementary figures, tables and notes (in Supplementary\_figures\_tables\_notes.pdf)  
6 5. Supplementary files (in Supplementary\_files.zip)  
7

8 **GSearch: Ultra-Fast and Scalable Microbial Genome Search**  
9 **by combining Kmer Hashing with Hierarchical Navigable**  
10 **Small World Graphs**

11  
12 Jianshu Zhao<sup>1,2,7</sup>, Jean Pierre-both<sup>3,7</sup>, Luis M. Rodriguez-R<sup>4,5,6</sup>, Konstantinos T.  
13 Konstantinidis<sup>1,2,4,\*</sup>

14 <sup>1</sup>Center for Bioinformatics and Computational Biology, Georgia Institute of Technology,  
15 Atlanta, Georgia, USA

16 <sup>2</sup>School of Biological Sciences, Georgia Institute of Technology, Atlanta, Georgia, USA

17 <sup>3</sup> Université Paris-Saclay, CEA, List, Palaiseau, France

18 <sup>4</sup>School of Civil and Environmental Engineering, Georgia Institute of Technology, Atlanta,  
19 Georgia, USA

20 <sup>5</sup>Department of Microbiology, University of Innsbruck, Innsbruck, Austria

21 <sup>6</sup>Digital Science Center (DiSC), University of Innsbruck, Innsbruck, Austria

22 <sup>7</sup>Those authors contribute equally

23 \*Corresponding author, Konstantinos T. Konstantinidis

24 ([kostas.konstantinidis@gatech.edu](mailto:kostas.konstantinidis@gatech.edu))

25

26

27 **Abstract**

28 Genome search and/or classification is a key step in microbiome studies and has become  
29 more challenging due to the increasing number of available (reference) genomes in  
30 recent years and the fact that traditional methods do not scale well with larger databases.  
31 By combining a kmer hashing-based genomic distance metric (Probminhash) with a  
32 graph based nearest neighbor search (NNS) algorithm (called Hierarchical Navigable  
33 Small World Graphs), we developed a new program, GSearch, that is at least ten times  
34 faster than alternative tools for the same purposes while maintaining high accuracy.  
35 GSearch can identify/classify eight thousand query genomes against all available  
36 microbial and viral genomic species within several minutes on a personal laptop, using  
37 only ~6GB of memory. Further, GSearch can scale well with millions of database  
38 genomes based on a database splitting strategy. Therefore, GSearch solves a major  
39 bottleneck in current and future microbiome studies that require genome search and/or  
40 classification.

41

42 **Keywords:** genome search, microbial genomes, MAGs, MinHash, nearest neighbor  
43 search, classification, hierarchical small world graphs, HNSW

44

45

46

47

48

## 49 **Introduction**

50       Classifying microbial species based on either universal marker genes (e.g., 16S or  
51 18S rRNA genes) or entire genomes represents a re-occurring task in environmental and  
52 clinical microbiome studies. However, this task is challenging because i) whether or not  
53 microbes (bacteria, fungi) and viruses form discrete population clusters (or species),  
54 remains an open question <sup>1</sup>, and ii) the microbial species in nature are still severely under-  
55 sampled by the available genomes. For instance, there are  $10^{12}$  bacterial and fungal  
56 species in nature according to a recent estimation <sup>2</sup> and even more viral species  
57 (e.g.  $>10^{14}$  species). Yet, only ~17,000 bacterial species have been described and even  
58 fewer (around 15,000) are represented by complete or draft genome <sup>3</sup>. Due to the recent  
59 improvements in DNA sequencing and single-cell technologies, metagenomic surveys  
60 can now recover hundreds, if not thousands, of these yet-to-be-described species from  
61 environmental or clinical samples <sup>4,5</sup>, filling in the gap in the described diversity mentioned  
62 above. This has created a new challenge, however; that is, identifying these new  
63 genomes against the exponentially increasing number of available (described) genomes  
64 has become computationally intractable. Nonetheless, the recent high-throughput  
65 sequencing of isolate genomes as well as metagenomic studies of natural populations  
66 have shown that species may exist and be commonly circumscribed based on a 95%  
67 genome-aggregate average nucleotide identity (ANI) threshold, at least for prokaryotes  
68 and viruses <sup>6,7</sup>. This threshold represents convenient means in searching and identifying

69 new genomes against the already described species and determining whether or not they  
70 represent novel species <sup>8</sup>.

71

72 The number of curated draft or complete prokaryotic genomes has reached  
73 317,542 in the newest release of the GTDB database, and 2,332,702 in the latest IMG/VR  
74 database for viruses, representing 65,703 prokaryotic and 935,122 viral distinct species  
75 at the 95% ANI level <sup>9, 10</sup>. Searching of query genomes against these large databases to  
76 find closely-related database/reference genomes for taxonomy classification based on  
77 the traditional brute-force methods, meaning, performing all vs. all searches, has become  
78 impractical, even for fast searching algorithms and/or small-to-medium computer clusters.  
79 For this task, faster search strategies are necessary. In addition to the searching strategy,  
80 the actual algorithm used to determine overall genetic relatedness between the query and  
81 the databased genomes is critical. While the traditional blast-based ANI among closely  
82 related genomes at the species level, and the genome-aggregate average amino acid  
83 identity (AAI) for genomes related at the genus level or above, have been proven to be  
84 highly accurate for genetic relatedness estimation across microbial and viral genomes <sup>11-</sup>  
85 <sup>13</sup>, they are too slow to use when dealing with more than a few dozen genomes. Faster  
86 implementations based on k-mer counting have been recently described to alleviate this  
87 bottleneck such as FastANI and MASH <sup>14, 15</sup>, but these methods still do not scale with an  
88 increasing number of database (or query) genomes, especially based on an all vs. all  
89 search strategy. Further, defining genetic distance (or relatedness) based on kmer  
90 profiles can be problematic for incomplete genomes, which are commonly recovered from  
91 metagenomic surveys, and/or genomes with lots of repeats. Kmer-weighted approaches

92 are advantageous in the latter cases because repeated genomic fragments can be  
93 considered when hashing but they have not been widely adopted yet <sup>16, 17</sup>. Recently, a  
94 phylogeny-based approach using a handful of universal genes (n= ~100) was developed  
95 to accelerate genome classification <sup>18</sup>. However, phylogenetic replacement based on  
96 concatenated universal gene tree can be memory demanding (300+ GB) and slow,  
97 especially for a large number of or a few deep-branching (novel) query genomes, and this  
98 approach cannot be applied to viral genomes, which lack universal genes. Further,  
99 universal genes due to their essentiality, are typically under stronger (purifying) selection  
100 and thus, evolve slower than the genome average. This property makes universal genes  
101 appropriate for comparisons among distantly related genomes, e.g., to classify genomes  
102 belong to new class or new phylum, but not the species and genus levels <sup>18, 19</sup>.

103         One of the most generally used approaches for finding closely related information  
104 to a query, while circumventing an all vs. all search, is the K-Nearest Neighbor Search  
105 (K-NNS). The K-NNS approach has been used for 16S rRNA gene-based classification  
106 followed by a vote strategy <sup>20, 21</sup> and, more recently, for whole genome and metagenome  
107 comparisons based on shared kmers <sup>14</sup>. Approximate nearest neighbor search (ANN)  
108 algorithms, such as locality-sensitive hashing (LSH) <sup>22, 23</sup>, k-dimension tree <sup>24</sup>, random  
109 projection trees <sup>25</sup>, k-graph <sup>26</sup> and proximity graph <sup>27, 28</sup> have been recently used to  
110 accelerate ANN search process. Proximity graph, as implemented for example in the  
111 hierarchical navigable small world graph (HNSW) <sup>29</sup>, has been shown to be one of the  
112 fastest ANN search algorithms <sup>30</sup>. HNSW incrementally builds a multi-layer structure  
113 consisting of a hierarchical set of proximity graphs (layers) for nested subsets of the  
114 stored elements. Then, through smart neighbor selection heuristics, inserting and

115 searching the query elements in the proximity graphs can be very fast while preserving  
116 high accuracy, even for highly clustered data<sup>27, 29</sup>. Therefore, finding the closest genomes  
117 in a database can be substantially accelerated by using HNSW.

118 Here, we describe GSearch (for Genome Search), a tool that combines the most  
119 efficient nearest neighbor search approaches (HNSW) with a universal approach to  
120 measure genetic relatedness among any microbial genome, including viral genomes,  
121 Probminhash<sup>31</sup>, implemented in the Rust language for higher speed. Probminhash is  
122 based on shared kmers, weighted by their abundance and normalized by total kmer size,  
123 which can account for genome incompleteness of prokaryotic genomes and repeats  
124 commonly found in eukaryotic and sometimes in prokaryotic genomes. Essentially,  
125 Probminhash computes the normalized weighted Jaccard distance between each pair of  
126 genomes and subsequently, the normalized (by total kmer size) weighted Jaccard  
127 distance is used as input to build HNSW to create the graph of the database genomes.  
128 Accordingly, the search of the query genome(s) against the graph to find the nearest  
129 neighbors for classification purposes becomes an ultra-fast step using GSearch and can  
130 be universally applied to all microbial genomes. The novelty of GSearch also includes a  
131 hierarchical pipeline that involves both nucleotide-level (when query genomes have close  
132 relatives at the species level) and amino-acid-level searching (when query genomes are  
133 somehow novel), which provides robust classification for query genomes regardless of  
134 their degree of novelty, as well as a database-splitting strategy that allows GSearch to  
135 scale up well to millions of database genome sequences.

136

137 **Results**

138 *Probminhash as a robust metric for genome relatedness of prokaryotes*

139 Correlations between Probminhash distance (or we called it ProbMASH after  
140 transformation) and ANI (determined by FastANI) or MASH distance showed that  
141 Probminhash is robust and slightly better than MASH for determining distances among  
142 bacterial genomes related at ~80% ANI, or higher, i.e., closely related genomes of the  
143 same or closely-related species (Spearman  $\rho=0.9643$  and  $0.9640$  respectively,  
144  $P<0.001$ , Figure S1 (a) and (b), note that for finding best hits compare to ANI, Spearman  
145 rank correlation is more relevant than Pearson correlation). For moderately related  
146 genomes, for which nucleotide-level ANI or distances are known to lose accuracy,  
147 Probminhash was still robust compared to MASH for bacterial genomes (amino acid  
148 distance or AAI), especially among genomes showing between ~52% and 95% AAI  
149 (Spearman  $\rho=0.90$ ,  $P<0.01$ , Supplementary Figure S2 (a) and (b)). Below ~50% AAI,  
150 both Probminhash and MASH distance lose accuracy compared to AAI. However, AAI of  
151 just universal genes provides a robust measurement of genetic relatedness at this level  
152 of distantly related genomes<sup>19</sup>, and we show here that Probminhash distance for the  
153 same set of universal genes is also robust (Spearman  $\rho=0.9390$ ,  $P<0.001$ ,  
154 Supplementary Figure S3). Thus, for distantly related (i.e., deep-branching) query  
155 genomes, e.g., their closest genome in the database is related at the order level or higher,  
156 restricting the search to the universal genes can provide robust classifications.

157

158 *Graph building and search against reference prokaryotic genomes is faster than*  
159 *alternative methods*

160 To build the database graph for the entire GTDB v207 database (65,703 unique, non-  
161 redundant prokaryotic species) at the nucleotide level, the tohnsw module of GSearch  
162 took 2.3 h on a 24-thread computing node and scaled well with increasing number of  
163 threads (Figure 2 (a)). Maximum memory required for the building step was 28.3 GB. The  
164 total size of written database files on disk was ~3.0 GB. There are 3 layers for the dumped  
165 graph, 65180, 519 and 4 genomes for layer 0,1 and 2 respectively. The searching of query  
166 genomes against this database graph, requesting best 50 neighbors for 1000 query  
167 genomes, which represented different previously known as well as novel species of eight  
168 bacterial phyla (see Methods for details on query genome selection), took 2.3 min  
169 (database loading 6 seconds) on a 24 thread machine and also scaled well with  
170 increasing number of threads (Figure 3 (a)). The memory requirement for the request  
171 (search) step was only 3.0 GB for storing the entire database file in memory. To evaluate  
172 the accuracy of these results, we compared the best neighbors found by GSearch with  
173 brute-force FastANI and GTDB-tk. All best neighbors found by brute-force FastANI and  
174 GTDB-tk for query genomes with close relatives in the database (e.g., showing >80%  
175 ANI) were found by GSearch (Supplemental File 1). Top 5 neighbors were 99.4%  
176 overlapping and top 10 were 96.3% overlapping between GSearch and the other two  
177 methods for the testing query genomes. We also compared the speed with MASH for the  
178 same kmer and sketch size and MASH dist step took 7.51 min for comparing 1000  
179 genomes with database using 24 threads. The speedup compared to MASH was even  
180 larger for ~8,000 query genomes. Specifically, it took 12.5 min for GSearch to find the top  
181 50 best hits (Supplementary Figure S4 (a)) while MASH took 80.8 minutes on the same  
182 24 thread machine. However, for a given number database genomes, speedup is



183 saturated to  $\log(N)$  as the number of query genome increases, where  $N$  is the number of  
184 database genomes. GSearch will be orders of magnitude faster than MASH for larger  
185 species database with millions of genomic species (see also phage section). GSearch  
186 query time for a given number of genomes is related to the number of database genomes  
187 in a  $O(\log(N))$  manner while brute-force methods are  $O(N)$ , and our empirical analysis is  
188 consistent with the theoretical  $\log(N)$  prediction (Supplementary Figure S4 (b)).

189

190 For building the amino-acid level graph for moderately related query genomes, all GTDB  
191 v207 genomes are used for gene calling by FragGeneScanRs and subsequently, the  
192 predicted amino acid sequences for each genome are used for the tohns module. The  
193 graph building step took 1.4 h (Figure 2 (b)) with maximum memory required for the  
194 building step to be 37.7 GB. The total size of written database files on disk by GSearch  
195 was 5.9 GB. There were 65158, 543 and 2 genomes for layer 0,1 and 2 respectively.  
196 Requesting 50 neighbors for 1000 genomes at this amino-acid level took 1.52 minutes  
197 with memory requirement  $\sim 6.0$  GB (database loading 9 seconds; Figure 3(b)). Top 5  
198 neighbors were 98.9% recall with those of the brute-force MASH or blast-based AAI  
199 approaches, with 97.1% overlap for the 10 top neighbors. In comparison, MASH dist took  
200 5.96 min using 24 threads; for 8000 query genomes, MASH dist took 47.2 min while  
201 GSearch took 5.6 min.

202

203 Finally, for most distantly related query genomes, the graph building for the universal  
204 gene set follows the same logic with the amino-acid level graph mentioned above except  
205 for using a smaller kmer size ( $k=5$ ) due to the smaller kmer space of 120 universal genes

206 vs. the whole-genome level (e.g., a few thousand genes). It took 7.76 min to build the  
207 database (Figure 2(c)) and 32 seconds to request 50 neighbors for 1000 queries on a 24  
208 threads node (Figure 3(c)) with similar high recall to the amino-acid level search (with top  
209 5 and top 10 recall, 98.2% and 97.1%, respectively).

210

211 We also evaluated the effect of genome completeness on search and classification  
212 accuracy given that bacterial genomes recovered from environmental metagenomes are  
213 frequently incomplete. GSearch was robust to genome incompleteness down to 50%  
214 completeness level, e.g., 80% of top 10 best matches are found, while accuracy  
215 decreased considerably below this level (Supplementary table S6).

216

#### 217 *Graph database building and searching for phage and fungal genomes*

218 Graph building and requesting for phage genomes is not effective at the nucleotide level  
219 because many phage genera are too diverse and do not have close relatives in the public  
220 genomic database; that is, the database is too sparse. Accordingly, kmer-based methods  
221 (e.g., MASH and probminhash) will often lead to imperfect graph structure for viral  
222 genomes. Therefore, we build only an amino-acid level graph for viral genomes, using all  
223 genes in the genome due to the lack of universal genes for viral genomes. Database  
224 building took 23.895 h on a 24-thread node (Supplementary Figure S6 (a)). Request 1000  
225 neighbors scales well with increasing number of threads and took about 4.4 min  
226 (database load takes additional 1.9 min) using 24 threads (Supplementary Figure S6 (b)).  
227 Top 10 neighbors for 1000 query phage genomes were still highly overlapping (98.32%  
228 recall; Supplemental Table S1) with the brute-force MASH-based approach. For such

229 large database, GSearch is about 20X faster than the brute-force MASH (Supplementary  
230 Tables S1). We also compare GSearch with a new database build method called  
231 PhageCloud, which relies on manually curated genome labels (e.g., environmental  
232 source) for graph database building in Neo4j database software and Dashing software  
233 for distance/relatedness computation. Since PhageCloud provides only a website and  
234 allows only one genome query at a time, we searched only one phage genome at a time  
235 with GSearch and MASH against the same database (Gut Phage Database <sup>32</sup>). It took 37  
236 seconds for finding the two best matches with PhageCloud while GSearch took 15  
237 seconds (database loading 14 seconds, search 1 second) for the same search. MASH  
238 on the other hand took 4 minutes to find the same 2 best matches. It should be noted,  
239 however, that, because the database is already available (loaded) on PhageCloud's  
240 website, 37 seconds is only for search and website responses (average value for 5 runs  
241 on 5 different days) whereas GSearch took only 1.5 second for the same step.

242

243 Graph building for fungal genomes is slower compared to prokaryotic genomes, despite  
244 the smaller number of available fungal genomes (n=9700) because the average fungal  
245 genome size is much larger and kmer and sketch size are accordingly much larger (k=21,  
246 s=48000). It took 2.3 h on a 24 thread node to build the nucleotide-level graph for these  
247 fungal genomes. Searching step was also slower due to the larger kmer space.  
248 Accordingly, it took 3.13 min for identifying 50 neighbors for 50 query fungal genomes  
249 while MASH took 4.4 min. Nonetheless, recall was still very high (~99.4%) against MASH  
250 and MUMMER-based ANI for the same datasets. For the amino-acid level graph, the time  
251 for graph building was only 0.61 h, shorter than the corresponding prokaryotic graph due

252 to the lower coding density of fungal genomes relative to the prokaryotic genomes.  
253 Identifying 50 neighbors for 50 query fungal genomes at the amino-acid level took 1.24  
254 min (MASH took 2.59 min) with similar high top 5 recall (~99.7%) against brute-force  
255 MASH (-a) and blastp-based AAI. Note that the difference in run time will be much larger  
256 between MASH and GSearch as the number of fungal database genome increases,  
257 which is similar to that of bacterial genomes

258

259 *Combining the three graphs/levels together and comparison with GTDB-tk for prokaryotic*  
260 *genome classification*

261 A three-step pipeline was developed to allow the identification and classification of a  
262 query genome, depending on its level of novelty compared to the database genomes  
263 (Figure 4). Specifically, when the query genome does not find a match in the database  
264 better than ANI > 78%, corresponding to probminhash distance 0.9850, the nucleotide-  
265 level graph is abandoned, and the amino-acid level is used instead. If no match against  
266 the latter graph is found above 52% AAI, corresponding to 0.9375 probminhash distance,  
267 the amino-acid level is abandoned, and the universal gene graph is used instead (uAAI  
268 based on universal gene below 80% indicates new order or higher taxonomic rank)(Figure  
269 4). The overall running time for classifying 1000 prokaryotic genomes of varied levels of  
270 taxonomic novelty on different computing platforms is showed in Table 1. On a 24 thread  
271 Linux node, it took a total of 5.85 minutes while it took 19.49 minutes on an intel Core i7  
272 laptop (2017 release) CPU personal laptop (6.02 minutes on the most recent ARM64  
273 CPU laptop). Classifying 1000 genomes using GTDB-tk took 244.7 min on the same Linux

274 node with 24 threads (Figure 3 (d), memory requirement is ~328G) while MASH takes  
275 53.7 min for 1000 genomes using 24 threads for the 3 steps.

276

277 In terms of the accuracy of the nearest neighbors found, query genomes (699 out of the  
278 total 1000) that had a best match higher than 78% ANI against the GTDB database  
279 genomes (i.e., a match at the same or closely related species), GSearch classified them  
280 exactly the same with GTDB-tk and FastANI (Supplementary File 1, only 100/699 are  
281 shown for simplicity). For the remaining 301 genomes that did not have same or closely  
282 related species-level matches, for 266 of them (or 87.1%), GSearch also provided the  
283 same classification with GTDB-tk but several inconsistencies were observed for 39/301  
284 genomes (Supplementary Figure S5). Specifically, we noticed that for GTDB-tk, which  
285 relies on RED values and tree topology, several genomes (n=14) were still classified at  
286 the genus level even though AAI value against the best database genomes found was  
287 below 60%, and some genomes (n=16) were still classified at the family level but not the  
288 genus level even though their best AAI value was above 65%. Several genomes (n=9)  
289 were classified at the order level but not family level even though their best AAI value was  
290 above 52%. Therefore, high consistency was overall observed between GSearch and  
291 GTDB-tk assignments, and the few differences noted were probably associated with  
292 contaminated (low quality) MAGs or taxonomic inconsistencies, which was challenging to  
293 assess further, and/or the peculiarities of each method. Since Probinhash distance  
294 correlated well with AAI in the range of AAI values between 52% and 95%, the  
295 classification results were always consistent with AAI-based classification, e.g., best  
296 matches of 65% AAI or higher were classified at the same genus by GSearch and blast-

297 based AAI and best matches of  $52\% < \text{AAI} < 65\%$  were typically classified at the same  
298 family<sup>33</sup>.

299

### 300 *Database split for large genomic species database*

301 For large databases (for example, >1 million bacterial genomes), the graph building and  
302 requesting step could require a large amount of memory (due to the larger kmer space)  
303 that is typically not available in a single computer node. We therefore provide a database  
304 split solution for such large databases. The average database building time on each node  
305 (for each piece of the database after the splitting step) scales linearly with increasing  
306 nodes/processors and requires much less memory (1/n total memory compared to when  
307 building in one node) (Supplementary Figure S7(a)). The searching time scales sub-  
308 linearly with increasing number of nodes (Supplementary Figure S7(b)). The top 10 best  
309 neighbor by splitting the database were exactly the same as the non-splitting strategy  
310 (Supplementary file 2). Note that without multi-node support (e.g., run database build  
311 sequentially), database build time is nearly the same with non-split strategy but memory  
312 requirement is only 1/n, where n is the number of database pieces, despite the fact that  
313 total request time will be larger (time\*n in Supplementary Figure S7(b)). However, since  
314 the request step is very fast, even for a decent number of pieces, overall runtime is still  
315 short with the database split approach. The database split strategy is especially useful  
316 when memory requirement is not satisfied on host machine for larger genomic species  
317 database (e.g., millions of genomes).

318

### 319 **Discussion**

320 A popular way to assess genetic relatedness among genomes is ANI, which  
321 corresponds well to both 16S/18S rRNA gene identity and DNA-DNA hybridization values,  
322 the golden standards of fungal and prokaryotic taxonomies <sup>11</sup>. As the number of available  
323 microbial genomes has grown at an unprecedented speed recently (e.g., there are 30%  
324 more (new) species in GTDB v202 (2020) vs. v207 (2022), and the number of bacterial  
325 species genomes alone is expected to surpass 1 million in the near future), the traditional  
326 way that blast-based ANI or faster kmer-based implementations (e.g., FastANI or MASH)  
327 are applied as an all vs. all search strategy (brute-force) does not scale because the  
328 running time grows linearly with increasing number of query genomes and/or genomes in  
329 the database. Phylogenetic approaches based on quick (approximate) maximum  
330 likelihood algorithms and a handful of universal genes as implemented -for example- in  
331 GTDB-Tk could be faster than brute-force approaches but are often not precise and  
332 require a large amount of memory for querying step <sup>18, 34</sup> while the database building step  
333 could take several weeks of run time because the underlying multiple sequence alignment  
334 of the database genomes is computationally intensive. Further, approaches that rely on  
335 k-medoid clustering to avoid all vs. all comparisons could be sometimes trapped into local  
336 minima because of arbitrary partitioning of database genomes into clusters, a known  
337 limitation of these methods <sup>19</sup>. Our GSearch software effectively circumvents these  
338 limitations by combining a new kmer hashing-based (Probminhash) algorithm for fast  
339 computation of genetic relatedness among genomes with a graph based nearest neighbor  
340 search algorithm. Accordingly, GSearch is at least an order of magnitude faster than  
341 alternative approaches for the same purposes. Note that GSearch could also be applied  
342 to whole metagenome comparisons and identification of the most similar metagenomes

343 in a series because ProbMinhash can estimate metagenomic distance in a similar way to  
344 genomes.

345 To the best of our knowledge, no current tool can efficiently search very large  
346 genome databases. GSearch is able to handle a million microbial genomes on a small-  
347 to-average computer cluster since the dumped database file size is proportional to the  
348 total number of genomes in database for fixed sketch size and graph parameters.  
349 Specifically, with a million genome species, dumped file size (amino acid) will be  
350  $5.9G \times 20 = 118$  GB, a modest computational requirement for current computer clusters.  
351 Further, due to the nature of graph based NNS algorithm, there is no need to build the  
352 entire database at once, but the database can split it into smaller pieces and thus, a  
353 separate graph database be built for each piece as exemplified above and depending on  
354 the computational resources available. For a modern laptop with 16 GB memory, a  
355 database on one million species can be split into 10 pieces, so dumped file for each piece  
356 will be only 11.8 GB, which can be loaded into memory, and then collect the results from  
357 each piece within an approximate total running time of 30 minutes (assume each part will  
358 be 3 minutes) (Supplementary table S7). With this logic, a computing node with 24 threads  
359 and 256 GB of memory available can easily deal with 20 million bacterial genomes. This  
360 represents a major improvement compared to existing tools for the same purposes.

361 It is also important to note that we could seemingly replace Probminhash with  
362 another relatedness algorithm should such an algorithm become available and has  
363 advantages in terms of speed and/or precision. Related to this, ANI as currently  
364 implemented -for instance- in FastANI is not appropriate for this function because it is not  
365 metric (that is, for the FastANI distances calculated among three genomes A, B, and C,



366 (A,B) + (B, C) is not necessary larger than (A,C), especially for genomes related at the  
367 phylum level). To solve this “metric” problem, a norm adjusted proximity graph (NAPG)  
368 was proposed based on inner product and it shows improvements in terms of both speed  
369 and recall <sup>35</sup>. This could be another direction for further improving the speed and recall of  
370 GSearch and/or the use of other metrics in place of Prominhash distances. In the  
371 meanwhile, Probminhash was used in GSearch because it is metric, which ensures  
372 neighbor diversity when building the graph, but also equally applicable to any microbial  
373 genome, including viral genomes, in addition to its advantages for kmer weighting and  
374 normalization mentioned above.

375 Another distinguishing aspect of GSearch (tohns module) is the speed and  
376 flexibility in building reference databases. Indeed, users could build reference databases  
377 (graphs) for any number and type (e.g., prokaryotic vs. viral) of genomes, up to several  
378 millions of genomes. The high efficiency in building graphs allows users to also test and  
379 optimize the key parameters of the graph, the M and ef\_construct parameters. For any  
380 given database size, M and ef\_construct determine the quality of the graph and graph  
381 build speed. Small M and ef\_construct may lead to frequent traps in local minima and  
382 thus, low recall while large M and ef\_construct may lead to slow speed without  
383 proportional improvement in recall (Supplemental Table S2). Therefore, there is a tradeoff  
384 between accuracy and speed that should be evaluated first. However, for most users this  
385 task would not be necessary because they will work with pre-built databases such as  
386 those provided here. Further, the search step against these pre-build databases with  
387 query genomes of known taxonomy for evaluating recall and tradeoffs can be performed,  
388 within minutes, on any modern laptop with 5-6 GB of memory (Table 1).

389 Kmer-based methods for genetic relatedness estimation such as Probminhash  
390 have lower accuracy between moderately-to-distantly related genomes compare to  
391 alignment-based tools (see supplement Note 4 for further discussion). Our empirical  
392 evaluation showed that this relatedness level, for nucleotide searches, is around 78% ANI  
393 and 52% AAI for the amino-acid searches (e.g., probminhash distances do not correlate  
394 well with blast-based ANI and AAI at these levels). To circumvent this limitation, we  
395 designed a 3-step framework as part of GSearch to classify bacterial genomes that show  
396 different levels of novelty compared to the database genomes, with high accuracy. This  
397 framework included a search at the universal gene level for deep-branching genomes  
398 that are novel at the phylum level (e.g., showing <52% AAI), for which searching at the  
399 entire proteome level is less accurate. Recently, methods that employ kmers that allow  
400 mismatches, that is, spaced kmers <sup>36</sup>, have shown promise in accurately estimating  
401 genomic relatedness even among distantly related genomes with gains in speed and has  
402 already been applied in classification. To apply spaced kmer to entire genomes, the  
403 recently developed “tensor sketch” approaches could be explored in the future to simplify  
404 the pipeline for bacterial and viral genomes <sup>37</sup>. In the meanwhile, the probminhash  
405 approach, essentially a Jaccard distance estimation via MinHash-based analysis of kmers, is  
406 highly efficiently, and, importantly, can effectively deal with incomplete genomes or  
407 genomes of (drastically) different length, an known limitation of MASH-based methods <sup>38</sup>.  
408 Comparing genomes of different length is not uncommon, e.g., bacterial genome size can  
409 differ by more than two-fold, as can be the case between MAGs of different level of  
410 completeness or when searching a short sequence (e.g., a bacteriophage genome)  
411 against a large genome collection (e.g., whole viral genome database). Probminhash is

412 more robust with genomes of unknown completeness by weighting completed genomes  
413 more due to the kmer normalization step, and our own analysis showed that it is robust  
414 down to 50% completeness level (Supplemental Table S6), which is also the most  
415 commonly used standard for selecting MAGs of sufficient/high quality <sup>39</sup>.

416 In general, the genome relatedness estimated, or best database matching genome  
417 identified by GSearch were highly consistent with Blast-based AAI results or phylogenetic  
418 placement of the genome using GTDB-tk, particularly for query genomes with close  
419 relatives in the database related at the species or genus level (Supplementary File 1,  
420 Supplementary Figure S5). For more distantly related query genomes relative to database  
421 genomes, classification results of GSearch showed some differences with GTDB-tk.  
422 These differences were not always possible to assess further for the most correct genome  
423 placement but could be due, at least partly, to the incompleteness and/or contamination  
424 of query or/and database genomes, which renders the resulting concatenated alignment  
425 of a few universal genes used by GTDB-tk unreliable <sup>40</sup> (and it is a few amino-acid  
426 positions per gene that are used in the final alignment). In contrast, the AAI and  
427 Probminhash approaches should be more robust to changes of a small number of genes  
428 because the entire proteome is considered <sup>15</sup>.

429 Graph-based NNS methods achieve good performance compared to tree based  
430 and locality-sensitive hashing (LSH) methods. Building a HNSW graph relies on proximity  
431 of database element; so, if the distances among database elements, in our case  
432 genomes, cannot be effectively estimated via hashing algorithms, the navigation in graph  
433 will be less efficient (e.g., get trapped in local minima) because the edges to choose from  
434 will not be accurate estimations of the targeted genomes they represent. This is especially

435 true for highly sparse/distantly related and diverse dataset, like the viral genome  
436 database, e.g., two phage genomes could often share very little genomic information  
437 (kmers) in the current dataset. This is confirmed by our own results when using  
438 nucleotide-level search to build the viral graph. Hence, the amino acid level will be much  
439 more robust for viral genomes and is the recommended level to use. Finally, the HNSW  
440 graph, and graph-based K-NNS in general, can be further improved by adding shortcut  
441 edges and maintaining a dynamic list of candidates, compared to a fixed list of candidates  
442 by default <sup>41</sup>. Graph reordering, a cache optimization that works by placing neighboring  
443 nodes in consecutive (or near-consecutive) memory locations, can also be applied to  
444 improve the speed of HNSW <sup>42</sup>. Another new direction for graph based NNS will be using  
445 Graphics Processing Unit (GPU) instead of CPU because GPUs are more efficient in  
446 handling matrix computations and machine learning tasks <sup>43</sup>. We will explore these  
447 options in future version of GSearch.

448

449 To summarize, GSearch, based on Probminhash and HNSW, solves a major  
450 current challenge in classification of microbial genomes, especially given the exponential  
451 increase in the number of newly sequenced genomes due to its efficiency and scalability.  
452 GSearch will serve the entire microbial sciences for several years to come since it can be  
453 applied to fungal, bacterial and viral genomes and will accelerate the process to find new  
454 biological knowledge.

455

456 **Data availability**

457 All the mentioned pre-built database for bacteria, fungi and phage genomes can be found  
458 at: <http://enve-omics.ce.gatech.edu/data/gsearch>

459

## 460 **Author Contribution**

461 J.Z, L.M and K.K designed the work, J.Z and J.P-B wrote the code (Genome part and  
462 algorithm part respectively), J.P-B implemented the Rust libraries of Kmerutils,  
463 Probinhash and Hnswlib-rs. J.Z and K.K wrote the paper. J.Z did the analysis and  
464 benchmark.

465

## 466 **Acknowledgment**

467 This work was supported by the US National Science Foundation (Award No 1759831  
468 and 2129823 to KTK). We want to thank PACE (Partnership for Advanced Computing  
469 Environment) at Georgia Tech for providing computing resources. We want to thank Kenji  
470 Gerhardt for helpful discussion on benchmarking against traditional ANI/AAI based tools  
471 and Chirag Jain for discussion on the graph based nearest neighbor search.

472

## 473 **Reference**

- 474 1. Bobay, L.-M. & Ochman, H. Biological species in the viral world. *Proceedings of the*  
475 *National Academy of Sciences* **115**, 6040-6045 (2018).
- 476 2. Locey, K.J. & Lennon, J.T. Scaling laws predict global microbial diversity. *Proceedings of*  
477 *the National Academy of Sciences* **113**, 5970-5975 (2016).
- 478 3. Federhen, S. Type material in the NCBI Taxonomy Database. *Nucleic Acids Research*  
479 **43**, D1086-D1098 (2014).
- 480 4. Almeida, A. et al. A unified catalog of 204,938 reference genomes from the human gut  
481 microbiome. *Nature Biotechnology* **39**, 105-114 (2021).
- 482 5. Nayfach, S. et al. A genomic catalog of Earth's microbiomes. *Nature Biotechnology* **39**,  
483 499-509 (2021).
- 484 6. Caro-Quintero, A. & Konstantinidis, K.T. Bacterial species may exist, metagenomics  
485 reveal. *Environmental microbiology* **14**, 347-355 (2012).
- 486 7. Deng, L. et al. Viral tagging reveals discrete populations in *Synechococcus* viral genome  
487 sequence space. *Nature* **513**, 242-245 (2014).

- 488 8. Rodriguez-R, L.M., Jain, C., Conrad, R.E., Aluru, S. & Konstantinidis, K.T. Reply to: “Re-  
489 evaluating the evidence for a universal genetic boundary among microbial species”.  
490 *Nature Communications* **12**, 4060 (2021).
- 491 9. Parks, D.H. et al. GTDB: an ongoing census of bacterial and archaeal diversity through a  
492 phylogenetically consistent, rank normalized and complete genome-based taxonomy.  
493 *Nucleic Acids Research* (2021).
- 494 10. Roux, S. et al. IMG/VR v3: an integrated ecological and evolutionary framework for  
495 interrogating genomes of uncultivated viruses. *Nucleic acids research* **49**, D764-D775  
496 (2021).
- 497 11. Konstantinidis, K.T. & Tiedje, J.M. Genomic insights that advance the species definition  
498 for prokaryotes. *Proceedings of the National Academy of Sciences* **102**, 2567-2572  
499 (2005).
- 500 12. Konstantinidis, K.T. & Tiedje, J.M. Towards a Genome-Based Taxonomy for  
501 Prokaryotes. *Journal of Bacteriology* **187**, 6258-6264 (2005).
- 502 13. Goris, J. et al. DNA–DNA hybridization values and their relationship to whole-genome  
503 sequence similarities. *International Journal of Systematic and Evolutionary Microbiology*  
504 **57**, 81-91 (2007).
- 505 14. Ondov, B.D. et al. Mash: fast genome and metagenome distance estimation using  
506 MinHash. *Genome Biology* **17**, 132 (2016).
- 507 15. Jain, C., Rodriguez-R, L.M., Phillippy, A.M., Konstantinidis, K.T. & Aluru, S. High  
508 throughput ANI analysis of 90K prokaryotic genomes reveals clear species boundaries.  
509 *Nature Communications* **9**, 5114 (2018).
- 510 16. Brown, C.T. & Irber, L. sourmash: a library for MinHash sketching of DNA. *Journal of*  
511 *Open Source Software* **1**, 27 (2016).
- 512 17. Bovee, R. & Greenfield, N. Finch: a tool adding dynamic abundance filtering to genomic  
513 MinHashing. *Journal of Open Source Software* **3**, 505 (2018).
- 514 18. Chaumeil, P.-A., Mussig, A.J., Hugenholtz, P. & Parks, D.H. GTDB-Tk: a toolkit to  
515 classify genomes with the Genome Taxonomy Database. *Bioinformatics* **36**, 1925-1927  
516 (2019).
- 517 19. Rodriguez-R, L.M. et al. The Microbial Genomes Atlas (MiGA) webserver: taxonomic  
518 and gene diversity analysis of Archaea and Bacteria at the whole genome level. *Nucleic*  
519 *Acids Research* **46**, W282-W288 (2018).
- 520 20. Wang, Q., Garrity, G.M., Tiedje, J.M. & Cole, J.R. Naïve Bayesian Classifier for Rapid  
521 Assignment of rRNA Sequences into the New Bacterial Taxonomy. *Applied and*  
522 *Environmental Microbiology* **73**, 5261-5267 (2007).
- 523 21. Schloss, P.D. et al. Introducing mothur: Open-Source, Platform-Independent,  
524 Community-Supported Software for Describing and Comparing Microbial Communities.  
525 *Applied and Environmental Microbiology* **75**, 7537-7541 (2009).
- 526 22. Indyk, P. & Motwani, R. in Proceedings of the thirtieth annual ACM symposium on  
527 Theory of computing 604-613 (1998).
- 528 23. Gionis, A., Indyk, P. & Motwani, R. in Vldb, Vol. 99 518-529 (1999).
- 529 24. Bentley, J.L. Multidimensional binary search trees used for associative searching.  
530 *Communications of the ACM* **18**, 509-517 (1975).
- 531 25. Dasgupta, S. & Sinha, K. in Proceedings of the 26th Annual Conference on Learning  
532 Theory, Vol. 30. (eds. S.-S. Shai & S. Ingo) 317--337 (PMLR, Proceedings of Machine  
533 Learning Research; 2013).
- 534 26. Dong, W., Moses, C. & Li, K. in Proceedings of the 20th international conference on  
535 World wide web 577-586 (2011).
- 536 27. Malkov, Y., Ponomarenko, A., Logvinov, A. & Krylov, V. Approximate nearest neighbor  
537 algorithm based on navigable small world graphs. *Information Systems* **45**, 61-68  
538 (2014).

- 539 28. Fu, C., Xiang, C., Wang, C. & Cai, D. Fast approximate nearest neighbor search with the  
540 navigating spreading-out graph. *arXiv preprint arXiv:1707.00143* (2017).
- 541 29. Malkov, Y.A. & Yashunin, D.A. Efficient and Robust Approximate Nearest Neighbor  
542 Search Using Hierarchical Navigable Small World Graphs. *IEEE Transactions on Pattern  
543 Analysis and Machine Intelligence* **42**, 824-836 (2020).
- 544 30. Aumüller, M., Bernhardsson, E. & Faithfull, A. ANN-Benchmarks: A benchmarking tool  
545 for approximate nearest neighbor algorithms. *Information Systems* **87**, 101374 (2020).
- 546 31. Ertl, O. ProbMinHash – A Class of Locality-Sensitive Hash Algorithms for the  
547 (Probability) Jaccard Similarity. *IEEE Transactions on Knowledge and Data Engineering*,  
548 1-1 (2020).
- 549 32. Camarillo-Guerrero, L.F., Almeida, A., Rangel-Pineros, G., Finn, R.D. & Lawley, T.D.  
550 Massive expansion of human gut bacteriophage diversity. *Cell* **184**, 1098-1109.e1099  
551 (2021).
- 552 33. Konstantinidis, K.T., Rosselló-Móra, R. & Amann, R. Uncultivated microbes in need of  
553 their own taxonomy. *The ISME Journal* **11**, 2399-2406 (2017).
- 554 34. Chaumeil, P.-A., Mussig, A.J., Hugenholtz, P. & Parks, D.H. GTDB-Tk v2: memory  
555 friendly classification with the Genome Taxonomy Database. *bioRxiv*,  
556 2022.2007.2011.499641 (2022).
- 557 35. Tan, S. et al. in Proceedings of the 27th ACM SIGKDD Conference on Knowledge  
558 Discovery & Data Mining 1552–1560 (Association for Computing Machinery, Virtual  
559 Event, Singapore; 2021).
- 560 36. Břinda, K., Sykulski, M. & Kucherov, G. Spaced seeds improve k-mer-based  
561 metagenomic classification. *Bioinformatics* **31**, 3584-3592 (2015).
- 562 37. Joudaki, A., Rättsch, G. & Kahles, A. Fast Alignment-Free Similarity Estimation By  
563 Tensor Sketching. *bioRxiv* (2021).
- 564 38. Koslicki, D. & Zabeti, H. Improving MinHash via the containment index with applications  
565 to metagenomic analysis. *Applied Mathematics and Computation* **354**, 206-215 (2019).
- 566 39. Bowers, R.M. et al. Minimum information about a single amplified genome (MISAG) and  
567 a metagenome-assembled genome (MIMAG) of bacteria and archaea. *Nature  
568 Biotechnology* **35**, 725-731 (2017).
- 569 40. Tan, G. et al. Current Methods for Automated Filtering of Multiple Sequence Alignments  
570 Frequently Worsen Single-Gene Phylogenetic Inference. *Systematic Biology* **64**, 778-  
571 791 (2015).
- 572 41. Prokhorenkova, L. & Shekhovtsov, A. in Proceedings of the 37th International  
573 Conference on Machine Learning, Vol. 119. (eds. D. Hal, III & S. Aarti) 7803--7813  
574 (PMLR, Proceedings of Machine Learning Research; 2020).
- 575 42. Coleman, B., Segarra, S., Shrivastava, A. & Smola, A. Graph Reordering for Cache-  
576 Efficient Near Neighbor Search. *arXiv preprint arXiv:2104.03221* (2021).
- 577 43. Groh, F., Ruppert, L., Wieschollek, P. & Lensch, H. GGNN: Graph-based GPU Nearest  
578 Neighbor Search. *IEEE Transactions on Big Data*, 1-1 (2022).

579  
580  
581  
582  
583  
584  
585  
586  
587

## Methods and Material/Online Methods

588 Briefly, GSearch is composed of the following steps. Initially, the genetic relatedness  
589 among a collection of database genomes is determined based on the probability MinHash  
590 algorithm (or Probminhash), which computes the normalized weighted Jaccard distance  
591 using the probminhash3a algorithm implemented in the probminhash <sup>1</sup>. The normalized  
592 weighted Jaccard distances are then used as input for building HNSW graphs (note that  
593 a distance computation is required only when that genome pair is required for graph  
594 building, thus GSearch avoids all vs. all distance computations). Genomes are  
595 subsequently recursively added as the nearest neighbors of each node in the built graph  
596 file with the same distance computation procedure. The built graph database file is stored  
597 on disk. Query genomes are then searched against graph database and subsequently,  
598 best neighbors are returned for classification. In this process, the best neighbor (or  
599 neighbors) is also identified based on the smallest normalized weighted Jaccard distance  
600 obtained.

601

### 602 *Probminhash*

603 MASH is a hashing-based algorithm based on MinHash <sup>2</sup>, which is very efficient for  
604 comparing genome/metagenome overall similarity <sup>3</sup>. MASH distances represent a kmer-  
605 based overall overlap between sequences according to a minimal evolutionary model.  
606 Essentially, MASH distance is the Jaccard similarity value of kmer shared between  
607 sequence sets A and B. However, MASH, and similar MinHash-based tools, have several  
608 limitations; most notably, the loss of k-mer frequency information (only presence/absence  
609 of kmer is counted) and the impact of relative set size (e.g., completeness level of a  
610 genome) on the Jaccard similarity estimates <sup>3, 4</sup> Although some recent MinHash



611 implementations address these limitations (e.g., the over-sketching and track-abundance  
612 methods of the MinHash-based tools finch , sourmash' or FracMinHash and  
613 HyperLogLog) <sup>5-8</sup>, they do not utilize the frequencies of all observed k-mers in generating  
614 the kmer-profile (sketch) for a given sequence set. More recently, in the HULK software,  
615 consistent weighted sampling (D<sup>2</sup>histosketch, P-MinHash algorithm was proposed for J<sub>p</sub>)  
616 <sup>9</sup> was utilized to incorporate k-mer frequency information when estimating weighted and  
617 standard Jaccard similarity, which effectively addresses these limitations mentioned  
618 above <sup>10</sup>. Notably, the hash algorithm (P-MinHash) used in D<sup>2</sup>histosketch could be further  
619 optimized to achieve a time complexity below  $O(nm)$  (where m denotes the signature size  
620 and n is the number of elements with nonzero weight in two sequence sets), further  
621 improving the performance of applications such as HULK. Motivated by the  
622 SuperMinHash for conventional Jaccard similarity estimation <sup>11</sup> and BagMinHash  
623 algorithm for weighted Jaccard similarity estimation <sup>12</sup>, probminhash (probminhash 3(a)  
624 and 4 algorithm) is orders of magnitude faster than the original algorithm P-MinHash  
625 proposed in D<sup>2</sup>histosketch <sup>1</sup>. Probminhash estimates the Jaccard probability J<sub>p</sub> index, and  
626  $1 - J_p$  is indeed a metric on probability distributions and is Pareto optimal (Supplementary  
627 Note 1) <sup>1, 13</sup>. Therefore, we reimplemented the Probminhash algorithm in Rust to estimate  
628 genetic relatedness between any two genomes based on normalized (weighted) Jaccard  
629 distances according to the original ProbMinHash paper <sup>1</sup> (Supplementary Note 1) . The  
630 Rust reimplementation of Probminhash can be found at: [https://github.com/jean-](https://github.com/jean-pierreBoth/probminhash)  
631 [pierreBoth/probminhash](https://github.com/jean-pierreBoth/probminhash). Two important parameters of Probminhash are the sketch size  
632 and kmer size. Similar to MinHash sketches, Probminhash sketches are also shared

633 hashes from hashed kmer set by taking into account of kmer weights (See Figure 1 of  
634 MASH paper). Time complexity analysis for ProbMinHash is in Supplementary Note 3.

635 To benchmark probminhash against MASH, we use the same sketch size  
636 ( $s=12000$ ) and kmer size ( $k=16$ ) for bacterial genomes at the nucleotide level and kmer  
637 size ( $k=7$ ) at the amino acid level for both database building and searching. For fungal  
638 genomes a larger sketch size (48000) was used due to much larger genome size Details  
639 of kmer choosing logic can be found in Supplementary Note 2. For graph search results,  
640 we also perform the same transformation of MASH distance from normalized weighted  
641 Jaccard distance to probMASH distance for convenience to compare with ANI based

$$probMASH = -\frac{1}{k} \ln \frac{2 * J_p}{J_p + 1}$$

642 methods.

643

#### 644 *Hierarchical Navigable Small World Graphs (HNSW)*

645 Generally, the framework of graph-based ANN search algorithm (here HNSW) can be  
646 summarized as the following two steps: 1) build a proximity graph (HNSW) where each  
647 node represents a database vector. Each database vector will connect with a few of its  
648 neighbors while maintaining small world property in each layer of HNSW. 2) Given a query  
649 vector (or sequence, kmer profile in our case), perform a greedy search on the proximity  
650 graph by comparing the query vector with database vectors under the searching  
651 measures (e.g., cosine similarity or L2 similarity, in our case probminhash distance).  
652 Then, the most similar candidates are returned as outputs. The key point for these two-  
653 step methods is step 1, to construct a high-quality index graph, which provides a proper  
654 balance between the searching efficiency and effectiveness. To guarantee the searching

655 efficiency, the degree (number of maximum allowed neighbors, denoted as  $M$ ) of each  
656 node is usually restricted to a small number (normally 20~200) while width of search for  
657 neighbor during inserting (denoted as  $ef\_construct$ ) is usually a larger number (above  
658 1000) to increase the chance to find best  $M$  neighbors by increasing the diversity of  
659 neighbors due to the larger number of them. Building graph and searching query against  
660 the graph follow very similar greedy search procedures except that there is an extra  
661 reverse updating of neighbors list for each vector when inserting database vector  
662 (building), one by one, into the existing graph (Figure 1 (a)). The first phase of the  
663 insertion/building process starts from the top layer by greedily traversing the graph in  
664 order to find maximum  $M$  closest neighbors to the inserted element  $P$  in the layer by doing  
665  $ef\_construct$  times search (Figure 1 (a)). After that, the algorithm continues the search  
666 from the next layer using the closest neighbor found from the previous layer as entry  
667 point, and the process repeats until to the bottom layer. Closest neighbors at each layer  
668 are found by a greedy and heuristic search algorithm (Figure 1 (b) and (c)). For building,  
669 after searches are finished at the bottom layer for each inserted element, a reverse update  
670 step will be performed to update the neighbor list of each node in the existing graph while  
671 for searching this is not needed. The overall database building time complexity is  
672  $O(N \cdot \log(N))$ , where  $N$  is the number of nodes in the graph. For searching, since there is  
673 no need to reverse update best neighbor list for each node in the graph, time complexity  
674 is (only)  $O(\log(N))$  (See Supplementary Note 3). Theoretical guarantee of graph-based  
675 algorithm can be found in Supplementary Note 5.

676

677 Program *implementation details in Rust*

678 We reimplemented the original hnsplib library written in C++ using the Rust programming  
679 language for its memory safety and thread use efficiency <sup>11</sup>. To benchmark our  
680 reimplementation of hnsplib, we followed standard ANN benchmark procedures using  
681 two popular testing datasets (MINST and SIFT1M) based on their Euclidean distance<sup>14</sup>.  
682 Our results showed that, for the MINST fashion dataset (784 dimensions, 60,000 vectors),  
683 recall for top 100 neighbors of 10,000 query vectors is greater than 98% for a smaller  
684 number of M and ef\_construct, and even higher recall rate (99.86%) for a medium M and  
685 ef\_construct while query speed is not compromised (Supplemental Table S2). For the  
686 SIFT1M dataset (128 dimensions, 1,000,000 vectors), recall for top 100 neighbors of  
687 10,000 query vectors was 99.77% for a medium M and ef\_construct (Supplemental Table  
688 S3 and S4). The Rust package hnsplib-rs can be found at: [https://github.com/jean-](https://github.com/jean-pierreBoth/hnsplib-rs)  
689 [pierreBoth/hnsplib-rs](https://github.com/jean-pierreBoth/hnsplib-rs). For each genomic database, we chose M and ef\_construct  
690 experimentally, by gradually increasing M and ef\_construct while monitoring query speed  
691 and recall, similar to what is shown in Supplementary Table S2 for MNIST dataset. We  
692 stopped the assessment when there was only a marginal increase in accuracy but decent  
693 decrease in speed. To leverage between recall and speed, we use M=128 and  
694 ef\_search=1600 for graph building for GTDB database fungal database while M=128,  
695 ef\_search=3200 for phage database. There are 2 modules in total: tohnsw and request.  
696 Tohnsw is to build graph by gradually inserting genomes into graph while request is to  
697 query new genomes against the graph database built in the tohnsw step. Tohnsw starts  
698 from reading database genomes and generating kmer profile and sketches for distance  
699 calculation. By selecting a random genome as the first genome to insert to the graph,  
700 tohnsw module gradually add genomes to existing graph file following HNSW constructing

701 rules mentioned above by computing Probminhash distance between genomes.  
702 Whenever a genome is going to be inserted into the existing graph, each genome in the  
703 graph will hold a list that store the M closest neighbors/genomes that are linked to itself  
704 and the distance to these neighbors. Then the distances of this genome with the nearest  
705 neighbors (M) of entry genome in this layer will be computed/searched (ef\_construct  
706 times) using Probminhash3a algorithm and the smallest distance of the neighbor  
707 genomes will be the new entry genome. This process will be repeated until the nearest  
708 genomes ( $\leq M$ ) in the layer are found and subsequently, the program will go to the layer  
709 below it using the genome that was represented by the nearest genome in the above  
710 layer as new entry genome in the new layer. The search layer algorithm is repeated until  
711 to the bottom layer is reached/analyzed. In contrast to the default settings in the original  
712 hnsplib, we allow the two parameters of neighbor selecting heuristics, *extendCandidates*  
713 to be true and *keepPrunedConnections* to be false because our genomic data is  
714 extremely clustered and there is no need to fix the number of connections per element  
715 considering the maximum connection allowed. Request module will load the graph  
716 database and then search query genomes against it to return best neighbors of each  
717 query following exact the same procedure with building step without updating the  
718 database. Both tohns and request module are paralleled for high performance (see  
719 Supplementary Note 6). The GSearch software can be found here:  
720 <https://github.com/jean-pierreBoth/archaea> or here:  
721 [https://gitlab.com/Jianshu\\_Zhao/archaea](https://gitlab.com/Jianshu_Zhao/archaea). GSearch relies on Kmerutils  
722 (<https://github.com/jean-pierreBoth/kmerutils>), which is a Rust package to manipulate

723 genomic fasta files including kmer string compression, kmer counting, filtering using  
724 cuckoo filter et.al.

725 Installation guide, manual and pre-built binaries can also be found. We provide static  
726 binaries on the release page for major platforms such as Linux and MacOS, with support  
727 for different CPU structures, e.g. Intel x86\_64 or ARM64. GSearch program can be run  
728 like this : 1) Build a graph database, which can be done running the following command:  
729 `tohnsw -d ./GTDB_r207 -k 16 -s 12000 -n 128 --ef 1600`; 2) Request neighbors of query  
730 genomes: `request -b . -r ../query_folder -n 50 (--aa)`.

731

### 732 *Prokaryotic classification pipeline*

733 The amino-acid level graph showed that closest neighbors were found, with high  
734 recall, when the query shared at least 52% AAI to its best neighbor. For more divergent  
735 genomes, showing lower than 52% AAI equivalent, whole-genome amino-acid level graph  
736 loses accuracy and we had to switch to universal, single-copy protein-coding genes. For  
737 the nucleotide-level graph, we used kmer=16 for bacteria and archaea to have high  
738 specificity for closely related database genomes (95% ANI to each other in GTDB  
739 database). For building the whole-genome amino-acid graph, we used k=7 to have the  
740 best specificity without *compromising* sensitivity, which is also consistent with previous  
741 research on amino acid sequences classification based on kmers<sup>15</sup>. For building graph  
742 based on universal gene set, we use k=5 because of much smaller total amino acid size.  
743 For details on the range of kmer that could be used for bacteria genome and proteome,  
744 bacteriophage genome and proteome, see Supplemental Notes 2.

745 The proteome of each genome was predicted by FragGeneScanRs for  
746 performance purpose compare to Prodigal despite small loss in precision (Supplementary  
747 Table S5) <sup>16</sup>. Hmsearch in the hmmer software <sup>16</sup> was used to extract universal gene  
748 collection for bacteria and archaea genome for the universal gene graph. Note that for  
749 phage genomes, this last step was not used because there is no universal single copy  
750 genes for viral genomes. Evaluation of the speed and memory requiremetns for all steps  
751 mentioned above were performed on a RHEL (Red Hat Enterprise Linux) v7.9 with 2.70  
752 GHz Intel(R) Xeon(R) Gold 6226 CPU. Unless noted otherwise, all 24 threads of the CPU  
753 are available by default.

754

#### 755 *Distributed implementation and database splitting*

756 To accommodate the increasing number of genomes that become available at an  
757 unprecedented speed in recent years and will soon reach 1 million or more, we provide  
758 an option to randomly split the database into a given number of pieces and build graph  
759 database separately for each piece. In the end, all best neighbors returned from each  
760 piece will be pooled and sorted by distance to have a new best K neighbor collection  
761 returned to the user for each query genome. We hereby prove that in terms of requesting  
762 top K best neighbors, the database split strategy is equivalent to non-split database  
763 strategy as long as the requested best neighbors for each database piece is larger than  
764 or equals to requested best neighbors in the non-split strategy. The underlying reason is  
765 that the best neighbors globally are also the best locally <sup>17</sup>. The database split and request  
766 will be done sequentially, on one node, without multi-node support. For now, we split  
767 GTDB database in to 5 pieces for testing purposes. In theory, a large database can be

768 split into any pieces as long as each piece can be used to build HNSW. In practice, a  
769 reasonable way is to split so that memory requirement for each piece is equal or smaller  
770 than the total memory of host machine. The database split idea has been used in several  
771 graph-based larger scale (e.g., billions) nearest neighbor search tasks in industry <sup>17, 18</sup>.

772

### 773 *Species database and testing genomes for benchmarking and recall*

774 GTDB version 207 was used to build database for bacteria and archaea genome species  
775 <sup>19</sup>. It appears that virtually all metagenome-assembled dsDNA viral populations form  
776 discrete genotypic clusters/species and can be appropriately delineated using a  $\geq 95\%$   
777 genome-wide ANI cut-off <sup>20</sup>. The IMGVR database version 3, with species representatives  
778 at a  $\geq 95\%$  genome-wide ANI were used for database building <sup>21</sup>. For fungal genomes,  
779 all genomes downloaded from the MycoCosm project (on 24th Jan., 2022) were used <sup>22</sup>.  
780 The amino acid sequences of predicted gene on the genomes were obtained using  
781 FragGeneScanRs. The Universal Single Copy Gene (USCG) gene set for GTDB  
782 genomes were also extracted via hmmer software.

783 To test the performance of our pipeline, we specifically chose genomes that are  
784 not included in the GTDB database (the database was used for graph building). In  
785 particular, the bacterial/archaeal genomes, mostly MAGs, reported by Ye and colleagues  
786 <sup>23</sup> and Tara Ocean MAGs (total 8,466 MAGs) <sup>24</sup> were used. We randomly selected 1000  
787 genomes/MAGs from Ye's collection and use them as query genomes to test the  
788 performance and accuracy of GSearch. To compare with other database search tools for  
789 large database e.g. phage database, we compare GSearch with PhageCloud <sup>25</sup>, which



790 builds a graph database based on the labels of each phage genome (e.g., environment  
791 source) and its search algorithm is Dashing2 (not published).

792

793 *Recall of AAI-, ANI- and MinHash-based nearest neighbor searching for*  
794 *bacteria/archaea, fungi and bacteriophage genomes.*

795 To benchmark how GSearch performs compared to ANI/AAI- and MinHash-based tools,  
796 we ran FastANI, Diamond blastp-based AAI and Mash to find the best neighbors for the  
797 same query dataset and evaluate whether or not the best neighbors found by GSearch  
798 were the same. FastANI parameters for the bacterial dataset were the following: fastANI  
799 --ql query\_path.txt --rl gtdb\_path.txt -k 16 -p 24 --minFrac 3000 -o ANI.txt. GTDB  
800 database was split into 50 subsets and run each subset parallelly on a multi-node  
801 supercomputer to reduce memory requirement. MASH parameters were: mash sketch -a  
802 (for AA only) -k 21 (7 for AA) -s 12000 -p 24 GTDB/\*.fna > gtdb.msh; mash dist -p 24  
803 gtdb.msh query.msh. For AAI calculation, the corresponding script in the enveomics  
804 package <sup>26</sup> was used: aai.rb -1 query.faa -2 db.faa -p diamond -t 24. Hmmer was used to  
805 search for universal single copy gene against pre-built hmm profiles (120 for archaea and  
806 122 for bacteria respectively); the profiles were obtained from the GTDB-tk software. For  
807 bacteriophage genome, FastANI fragment size 1000 was used instead of 3000 while  
808 aai.rb fragment size is 500 instead of 1000 with minimal number of matches of 5. MASH  
809 kmer size 11 and 7 was used for nucleotides and amino acid, respectively, for  
810 bacteriophage. For fungal genome ANI calculation, we use MUMMER v4.0.0 with default  
811 parameters <sup>27</sup>. Gene prediction for fungal genomes was performed using GeneMark-ES  
812 v2 (--fungus --ES) <sup>28</sup>. Kmer size 21 and 11 was used for fungal genomes in MASH for

813 nucleotides and amino acid, respectively. Detailed description of kmer size for each type  
814 of genome can be found in Supplemental Note 2.

815 We calculated recall for our tool compare to standard ANI/AAI and MASH in the  
816 following way: since biological species database are generally sparse because we are far  
817 away from sequencing all species in the environment and likely the existence of natural  
818 gaps in diversity, a larger top K by HNSW (e.g., 100) compared to the value used in  
819 standard benchmark dataset will offer little, if any advantage, especially when the query  
820 are relatively new, e.g. a new family compare to database genomes. Therefore, we use  
821 top 5 and 10. Top 5 and top 10 recall are calculated based on top 5 and 10 neighbors  
822 found by our tool and the available tools, and if all top 5 or 10 found by the latter tools  
823 were also in top 5 or 10 of our tool, then recall was 100%. Similarly, if only 4 or 9 are  
824 found by our tools, then recall was 80% and 90% respectively. However, if the distance  
825 of query to some of the top 10 or top 5 neighbors found by our tool at the nucleotide level  
826 was larger than 0.9850 for bacterial genomes, these matches will be filtered out and only  
827 those neighbors below 0.9850 will be used (e.g. 8 out of 10 are kept, so only top 8 is  
828 compared) because we have shown that above this threshold, Minhash-based methods  
829 will lose accuracy and this is not specific to HNSW. Similar rules were applied for the  
830 amino acid level searches with the threshold 0.9720 for filtering out bacterial genomes.

## 831 References

- 832 1. Ertl, O. ProbMinHash – A Class of Locality-Sensitive Hash Algorithms for the  
833 (Probability) Jaccard Similarity. *IEEE Transactions on Knowledge and Data Engineering*,  
834 1-1 (2020).
- 835 2. Broder, A.Z. in Proceedings. Compression and Complexity of SEQUENCES 1997 (Cat.  
836 No. 97TB100171) 21-29 (IEEE, 1997).
- 837 3. Ondov, B.D. et al. Mash: fast genome and metagenome distance estimation using  
838 MinHash. *Genome Biology* **17**, 132 (2016).
- 839 4. Koslicki, D. & Zabeti, H. Improving MinHash via the containment index with applications  
840 to metagenomic analysis. *Applied Mathematics and Computation* **354**, 206-215 (2019).
- 841 5. Brown, C.T. & Irber, L. sourmash: a library for MinHash sketching of DNA. *Journal of*  
842 *Open Source Software* **1**, 27 (2016).
- 843 6. Bovee, R. & Greenfield, N. Finch: a tool adding dynamic abundance filtering to genomic  
844 MinHashing. *Journal of Open Source Software* **3**, 505 (2018).
- 845 7. Irber, L. et al. Lightweight compositional analysis of metagenomes with FracMinHash  
846 and minimum metagenome covers. *bioRxiv*, 2022.2001.2011.475838 (2022).
- 847 8. Baker, D.N. & Langmead, B. Dashing: fast and accurate genomic distances with  
848 HyperLogLog. *Genome Biology* **20**, 265 (2019).
- 849 9. Yang, D., Li, B., Rettig, L. & Cudré-Mauroux, P. D<sup>2</sup>histoSketch: Discriminative and  
850 Dynamic Similarity-Preserving Sketching of Streaming Histograms. *IEEE Transactions*  
851 *on Knowledge and Data Engineering* **31**, 1898-1911 (2019).
- 852 10. Rowe, W.P.M. et al. Streaming histogram sketching for rapid microbiome analytics.  
853 *Microbiome* **7**, 40 (2019).
- 854 11. Ertl, O. Superminhash-A new minwise hashing algorithm for jaccard similarity estimation.  
855 *arXiv preprint arXiv:1706.05698* (2017).
- 856 12. Ertl, O. in Proceedings of the 24th ACM SIGKDD International Conference on  
857 Knowledge Discovery & Data Mining 1368–1377 (Association for Computing  
858 Machinery, London, United Kingdom; 2018).
- 859 13. Ioffe, S. in 2010 IEEE International Conference on Data Mining 246-255 (2010).
- 860 14. Aumüller, M., Bernhardsson, E. & Faithfull, A. ANN-Benchmarks: A benchmarking tool  
861 for approximate nearest neighbor algorithms. *Information Systems* **87**, 101374 (2020).
- 862 15. Déraspe, M., Boisvert, S., Laviolette, F., Roy, P.H. & Corbeil, J. Fast protein database as  
863 a service with kAAmer. *bioRxiv*, 2020.2004.2001.019984 (2020).
- 864 16. Van der Jeugt, F., Dawyndt, P. & Mesuere, B. FragGeneScanRs: faster gene prediction  
865 for short reads. *BMC Bioinformatics* **23**, 198 (2022).
- 866 17. Malkov, Y.A. & Yashunin, D.A. Efficient and Robust Approximate Nearest Neighbor  
867 Search Using Hierarchical Navigable Small World Graphs. *IEEE Transactions on Pattern*  
868 *Analysis and Machine Intelligence* **42**, 824-836 (2020).
- 869 18. Fu, C., Xiang, C., Wang, C. & Cai, D. Fast approximate nearest neighbor search with the  
870 navigating spreading-out graph. *arXiv preprint arXiv:1707.00143* (2017).
- 871 19. Parks, D.H. et al. GTDB: an ongoing census of bacterial and archaeal diversity through a  
872 phylogenetically consistent, rank normalized and complete genome-based taxonomy.  
873 *Nucleic Acids Research* (2021).
- 874 20. Gregory, A.C. et al. Marine DNA viral macro-and microdiversity from pole to pole. *Cell*  
875 **177**, 1109-1123. e1114 (2019).
- 876 21. Roux, S. et al. IMG/VR v3: an integrated ecological and evolutionary framework for  
877 interrogating genomes of uncultivated viruses. *Nucleic acids research* **49**, D764-D775  
878 (2021).

- 879 22. Grigoriev, I.V. et al. MycoCosm portal: gearing up for 1000 fungal genomes. *Nucleic*  
880 *acids research* **42**, D699-D704 (2014).
- 881 23. Ye, L., Mei, R., Liu, W.-T., Ren, H. & Zhang, X.-X. Machine learning-aided analyses of  
882 thousands of draft genomes reveal specific features of activated sludge processes.  
883 *Microbiome* **8**, 1-13 (2020).
- 884 24. Nishimura, Y. & Yoshizawa, S. The OceanDNA MAG catalog contains over 50,000  
885 prokaryotic genomes originated from various marine environments. *Scientific Data* **9**,  
886 305 (2022).
- 887 25. Rangel-Pineros, G. et al. From Trees to Clouds: PhageClouds for Fast Comparison of~  
888 640,000 Phage Genomic Sequences and Host-Centric Visualization Using Genomic  
889 Network Graphs. *PHAGE* **2**, 194-203 (2021).
- 890 26. Rodriguez-R, L.M. & Konstantinidis, K.T. (PeerJ Preprints, 2016).
- 891 27. Marçais, G. et al. MUMmer4: A fast and versatile genome alignment system. *PLOS*  
892 *Computational Biology* **14**, e1005944 (2018).
- 893 28. Ter-Hovhannisyanyan, V., Lomsadze, A., Chernoff, Y.O. & Borodovsky, M. Gene prediction  
894 in novel fungal genomes using an ab initio algorithm with unsupervised training. *Genome*  
895 *research* **18**, 1979-1990 (2008).
- 896  
897  
898  
899  
900  
901  
902  
903  
904  
905  
906  
907  
908  
909  
910  
911  
912  
913  
914  
915  
916  
917  
918  
919  
920  
921  
922

923 **Figures**

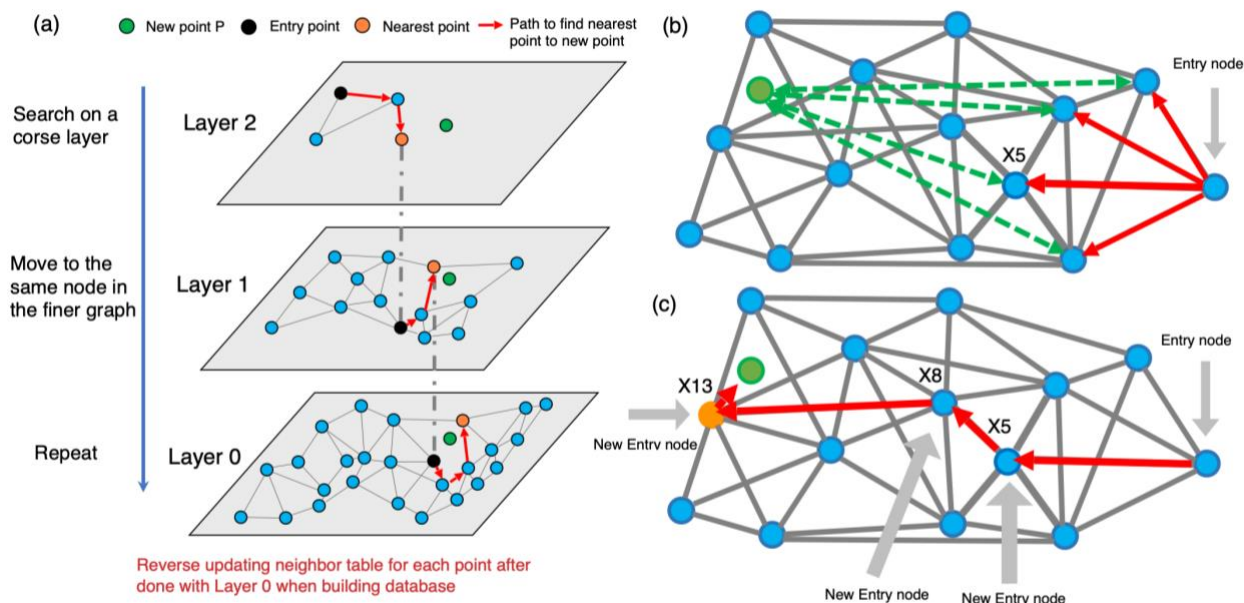

924 **Figure 1.** Schematic overview of GSearch building graph and searching graph steps.  
925 (a) Graph was clasped into hierarchical layers following exponential decay probability.  
926 In this graph,  $ef$  and  $M$ , represent the number of searches when finding nearest  
927 neighbors and maximum allowed number of neighbors for each node, respectively. In  
928 each layer, starting from an entry node (random or inherit from layer above it,  
929 depending on whether it is the top layer or not), GSearch finds the closest connected  
930 neighbor of the entry node and assigns it as the new entry point P (b), and then  
931 traverses in a greedy manner (i.e., update the entry point using the newly found closest  
932 connected neighbor (c)) until the nearest neighbor in the layer is found, and then goes  
933 to next layer. This process is repeated until required number of nearest neighbors are  
934 all found for the given new querying/inserting point. For building graph, after the  
935 required number of nearest neighbors are found, a reverse update step will be  
936 performed to update neighbor list of all nodes in the graph.

937  
938  
939  
940  
941  
942

943  
944  
945  
946  
947  
948  
949  
950  
951  
952  
953  
954  
955  
956  
957  
958  
959  
960  
961  
962  
963  
964  
965  
966  
967  
968  
969  
970  
971  
972  
973  
974  
975  
976  
977  
978  
979  
980  
981  
982  
983  
984  
985  
986  
987  
988

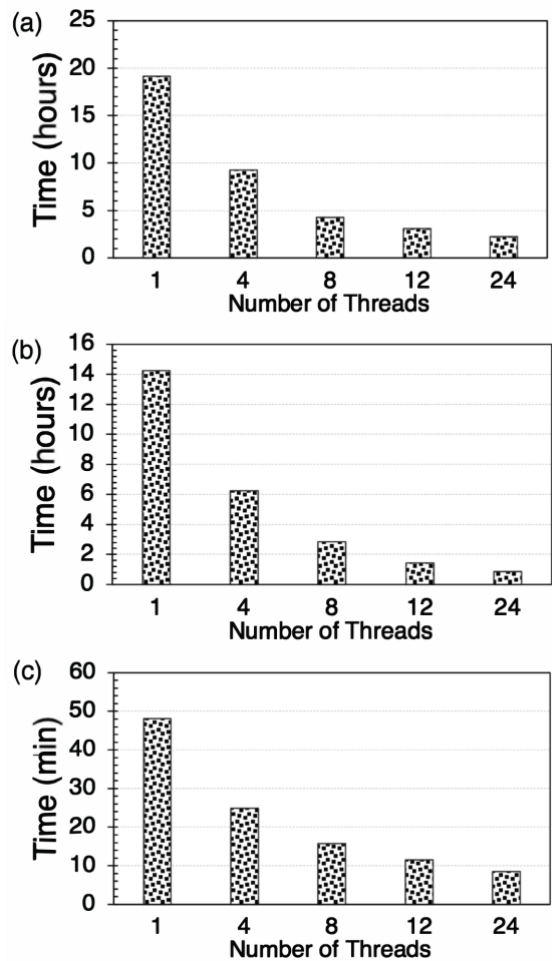

**Figure 2.** Scalability of database building process with the number of threads used. Panels show total wall time (y=axes) for building GTDB genome (nucleotide level) (a), whole-genome proteome (amino acid level) (b) and universal gene set proteome (c) databases. All tests were ran on a 24-thread Intel (R) Xeon (R) Gold 6226 processor, with 40GB memory available.

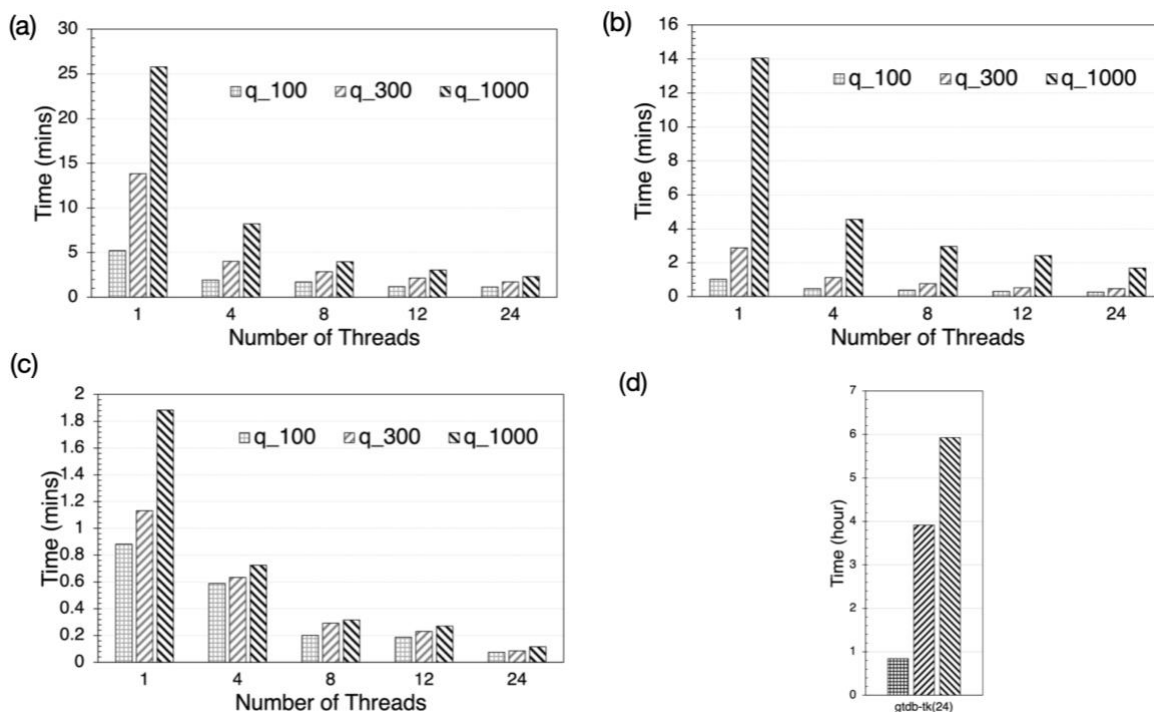

989

990

991

**Figure 3.** Total request time (wall time) for searching query genomes against the pre-built database of all GTDB genome (v207) at the whole-genome nucleotide (a), whole-genome proteome (b) and universal gene set proteome (c) levels. 100, 300 and 1000 query genomes (figure key) were used on a 24-thread Intel (R) Xeon (R) Gold 6226 processor. On average, database loading time ranged from 5-10 seconds. (d) is time needed to classify the same genomes using GTDB-Tk on the same 24-thread node.

996

997

998

999

1000

1001

1002

1003

1004

1005

1006

1007

1008

1009

1010

1011

1012

1013

1014

1015

**Figure 4.** Overview of the GSearch pipeline for classifying prokaryotic genomes. Orange boxes denote steps that aim to prepare genome files, in different formats, for graph building while

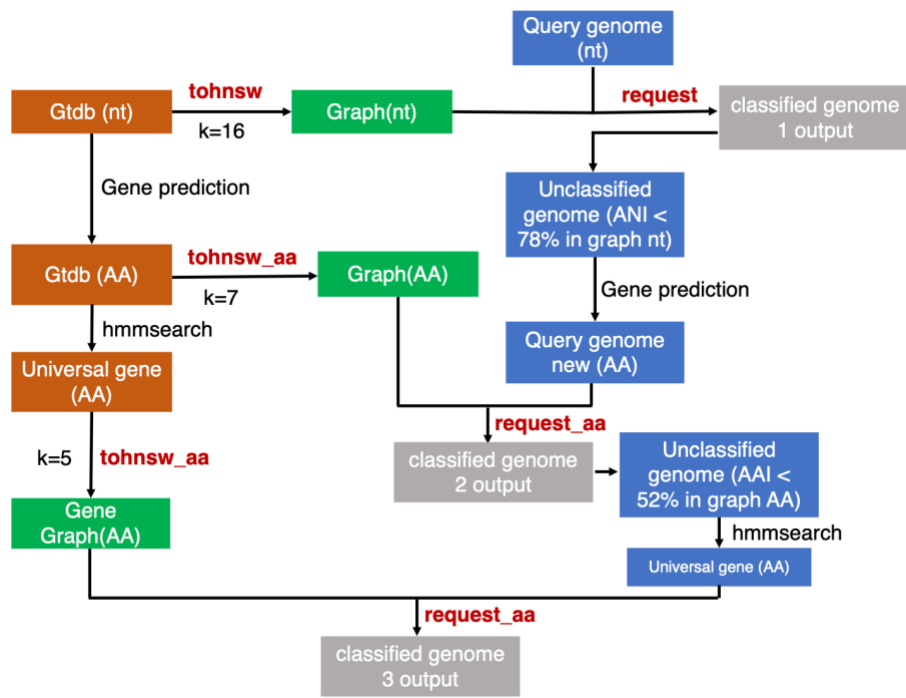

1016 green boxes denote building steps of the graph database (in nucleotide or amino acid format).  
 1017 Blue boxes indicate input/query genomes to search against the database while grey boxes  
 1018 indicate classification output for each input. Gene prediction was done using FragGeneScanRs  
 1019 and hmmsearch as part of the hmmer software for homology search. Two key steps of  
 1020 GSearch: tohns\_w (aa) and request (aa) are used to build graph database and request new  
 1021 genomes, respectively. Two thresholds are used in the pipeline to decide between whole  
 1022 nucleotide vs. whole-genome amino acid search and whole-genome amino acid vs. universal  
 1023 gene amino acid, 78% ANI and 52% AAI, corresponding to Probinhash distance 0.9850 and  
 1024 0.9375, respectively (see main text).

1025  
1026  
1027  
1028  
1029  
1030  
1031  
1032  
1033  
1034  
1035  
1036  
1037  
1038  
1039  
1040  
1041  
1042  
1043  
1044  
1045

## Tables



1046 **Table 1.** Request/search performance on major CPU platforms for GTDB v207 database for  
1047 1000 queries.

| CPU                                       | Number of threads | Clock speed (GHz) | Request time for nt (min) | Gene Prediction-FGSrs (min) <sup>c</sup> | Request time for proteome (min) | hmmsearch time (min) <sup>d</sup> | Request time for USCG (min) |
|-------------------------------------------|-------------------|-------------------|---------------------------|------------------------------------------|---------------------------------|-----------------------------------|-----------------------------|
| Intel (R) Xeon (R) Gold 6226 <sup>a</sup> | 24                | 2.70              | <b>2.329</b>              | 1.348                                    | <b>1.334</b>                    | 0.524                             | <b>0.117</b>                |
| Intel (R) Core i7-7770HQ <sup>b</sup>     | 8                 | 2.80              | <b>8.654</b>              | 6.764                                    | <b>2.041</b>                    | 1.534                             | <b>0.510</b>                |
| AMD EPYC 7513a <sup>a</sup>               | 32(24 used)       | 2.60              | <b>1.937</b>              | 1.120                                    | <b>1.021</b>                    | 0.345                             | <b>0.102</b>                |
| Apple M1 Pro <sup>b</sup>                 | 10                | 3.22              | <b>2.369</b>              | 2.12                                     | <b>0.866</b>                    | 0.498                             | <b>0.168</b>                |

1048  
1049  
1050  
1051  
1052  
1053  
1054  
1055  
1056

<sup>a</sup> RHEL v7.9, Linux v3.10.0-1160, all threads used.

<sup>b</sup> MacOS v12.3, Darwin 21.4.0, all threads used.

<sup>c</sup> Parallel package was used to run multiprocessing at the same time. FGSrs stands for FragGeneScanRs. Note that in practice only those genomes failed in the Request for nt step (best found is less than 78% ANI) will be used in this step.

<sup>d</sup> Only 100 genomes are used for testing hmmsearch because this step is for very new genomes at order level or above and we often do not have that many new genomes in a real-world dataset. Parallel Packages was used to run multiple processes of hmmsearch, one thread per process for hmmsearch.
